# Supplementary material for: Fulvic acid complexation of Eu(iii) and Cm(iii) at elevated temperatures studied by time-resolved laser fluorescence spectroscopy
Source: Royal Society of Chemistry journal article supplement (doi:10.1039/c4dt02339k), 2014-09-01
Supplement: c4dt02339k1.pdf [file c4dt02339k1.pdf]

Fulvic acid complexation of Eu(III) and Cm(III) at  
elevated temperatures studied by time-resolved laser  
fluorescence spectroscopy

Supporting information

*Daniel R. Fröhlich<sup>\*†</sup>, Andrej Skerencak-Frech<sup>‡</sup>, Michael Gast<sup>†</sup>, Petra J. Panak<sup>†,‡</sup>*

<sup>†</sup> Ruprecht-Karls-Universität Heidelberg, Physikalisch-Chemisches Institut, Im Neuenheimer  
Feld 253, 69120 Heidelberg, Germany

<sup>‡</sup> Karlsruher Institut für Technologie, Institut für Nukleare Entsorgung, P.O. Box 3640, 76021  
Karlsruhe, Germany

\* E-mail: [daniel.froehlich@partner.kit.edu](mailto:daniel.froehlich@partner.kit.edu)

**Table S1.**  $f_i$  factors of the different Eu(III)-FA complexes at T = 20 - 80 °C. The  $f_i$  factor of the Eu(III) aquo ion at each temperature is defined to be 1.

|          | 20°C | 40°C | 60°C | 80°C |
|----------|------|------|------|------|
| Gohy-573 | 17.4 | 10.1 | 5.5  | 3.9  |
| SR       | 5.0  | 2.8  | 2.1  | 1.9  |
| NL       | 7.2  | 3.4  | 2.4  | 1.6  |

**Table S2.** Results of the slope analyses of the complexation of Eu(III) and Cm(III) with the different FAs (Gohy-573, SR, NL) in 0.1 m NaCl solution..

| T / °C | Eu(III)     |             |             | Cm(III)     |             |             |
|--------|-------------|-------------|-------------|-------------|-------------|-------------|
|        | Gohy-573    | SR          | NL          | Gohy-573    | SR          | NL          |
| 20     | 0.95 ± 0.20 | 1.06 ± 0.14 | 1.00 ± 0.11 | 1.14 ± 0.07 | 1.07 ± 0.07 | 1.12 ± 0.06 |
| 40     | 0.94 ± 0.10 | 0.91 ± 0.06 | 1.14 ± 0.09 | 1.11 ± 0.07 | 1.28 ± 0.08 | 1.19 ± 0.07 |
| 60     | 0.96 ± 0.09 | 1.13 ± 0.07 | 1.14 ± 0.08 | 1.26 ± 0.08 | 1.27 ± 0.08 | 1.27 ± 0.08 |
| 80     | 1.08 ± 0.12 | 1.14 ± 0.14 | 0.85 ± 0.12 | 1.14 ± 0.07 | 1.18 ± 0.08 | 1.15 ± 0.08 |

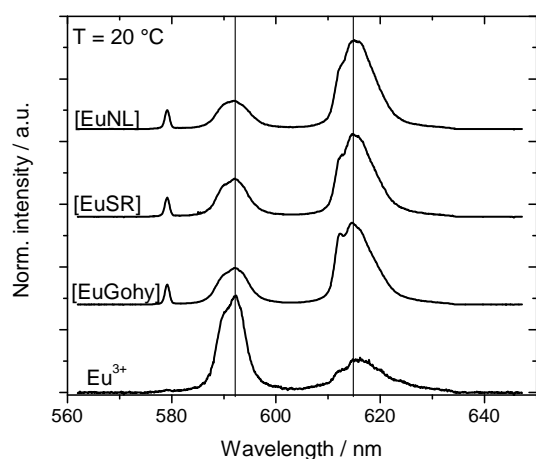

**Figure S1.** Single component spectra of Eu(III)<sub>aq</sub> and Eu(III)-FA complexes (FA = Gohy-573, SR, NL) at room temperature in 0.1 m NaCl solution ( $[H^+] = 10^{-4}$  mol/kg) obtained by peak deconvolution.

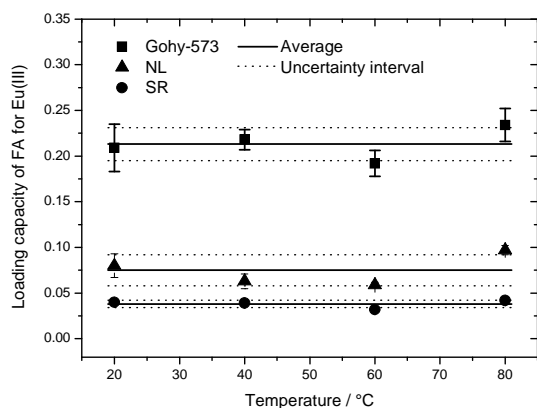

**Figure S2.** Loading capacities of different FAs for Eu(III) as a function of the temperature in 0.1 m NaCl solution (at  $[H^+]_{total} = 10^{-4}$  mol/kg) together with the average values and uncertainty intervals.

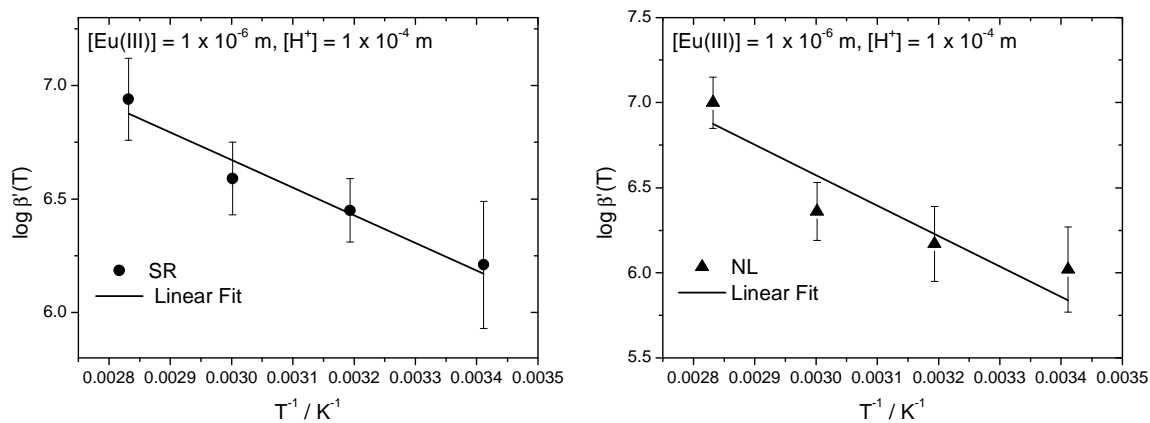

**Figure S3.** Arrhenius plot of  $\log \beta'(T)$  (given in Table 1) of the complexation of Eu(III) with SR and NL FA in 0.1 m NaCl solution.

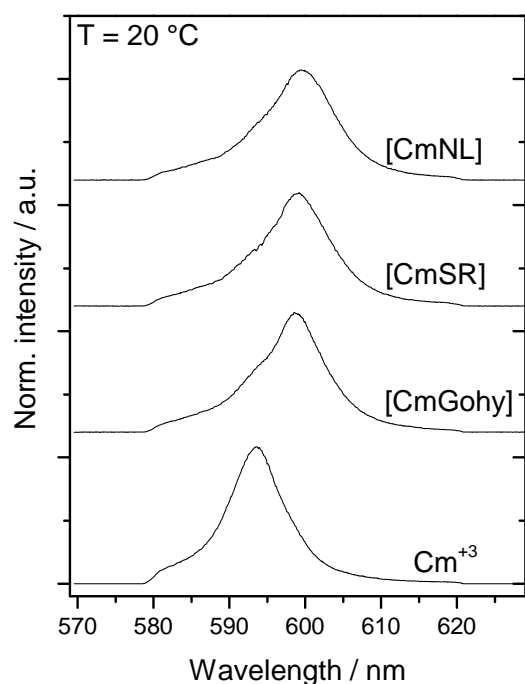

**Figure S4.** Single component spectra of Cm(III)<sub>aq</sub> and Cm(III) FA complexes (FA = Gohy-573, SR, NL) determined by peak deconvolution at room temperature in 0.1 m NaCl solution ( $[H^+] = 10^{-4}$  mol/kg).

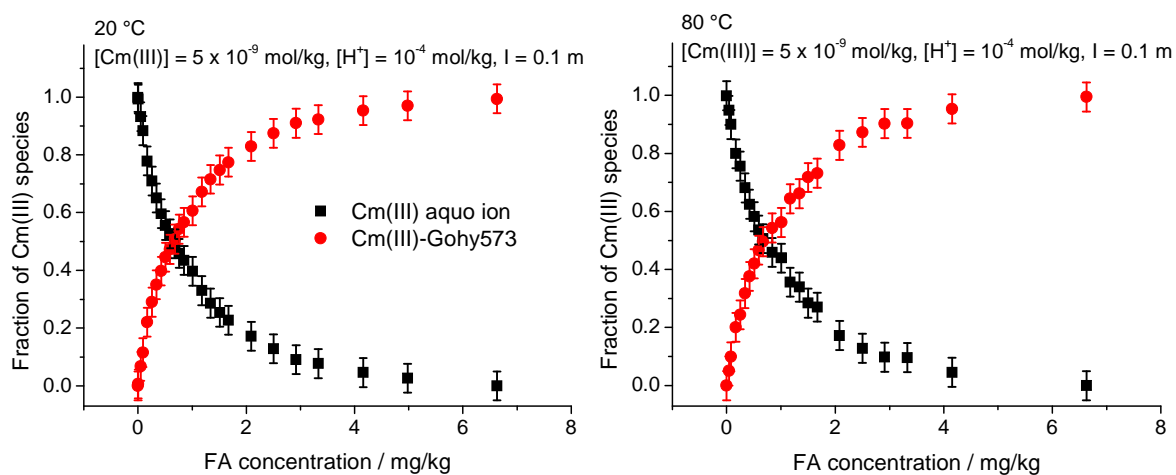

**Figure S5.** Cm(III) speciation in the presence of Gohy-573 FA as a function of ligand concentration at  $T = 20$  and  $80$  °C in 0.1 m NaCl solution ( $[H^+] = 10^{-4}$  mol/kg).

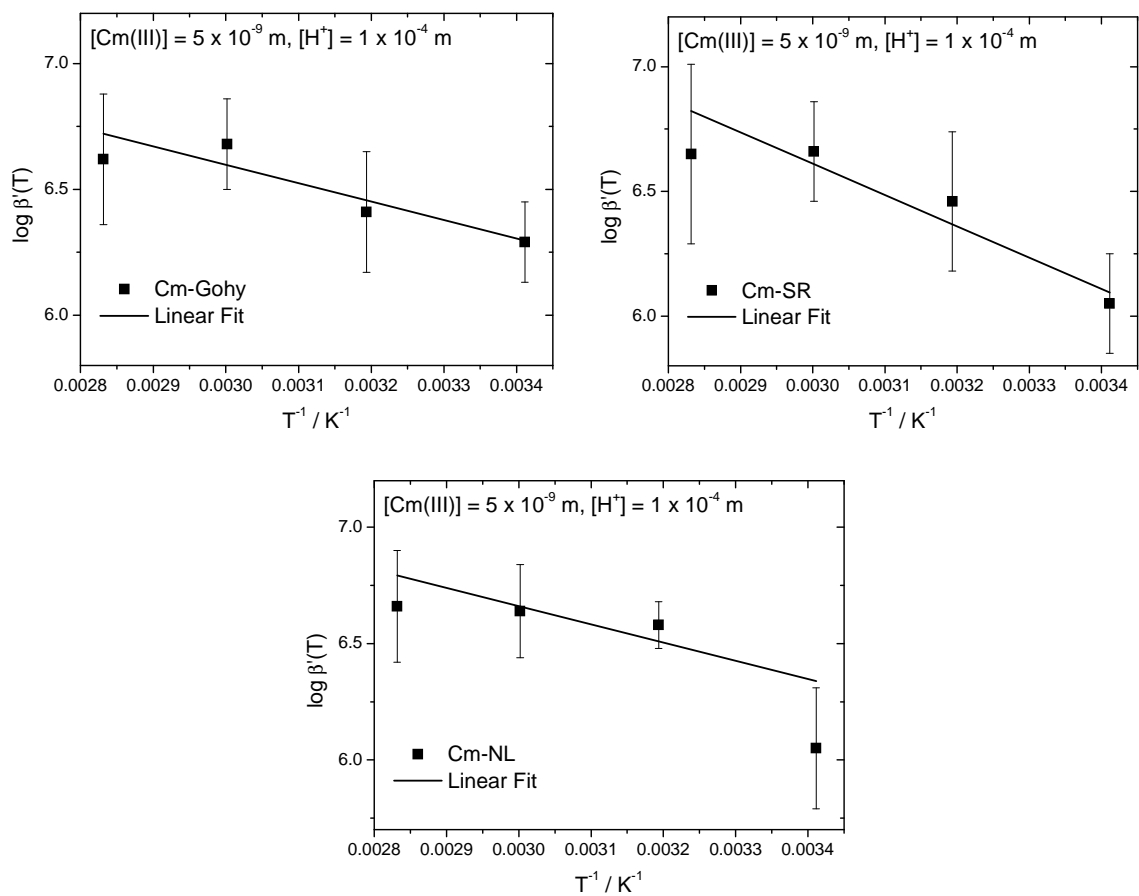

**Figure S6.** Arrhenius plot of  $\log \beta'(T)$  (given in Table 3) for the interaction of Cm(III) with Gohy-573, SR and NL FA in 0.1 m NaCl solution.
